# Supplementary material
Source: PubMed Central journal article supplement (PMC2813396)
Supplement: NIHMS141714-supplement-1.pdf [file NIHMS141714-supplement-1.pdf]

**Supplemental Table 1. 60 9p21 SNPs considered for association with PMI based on logistic regression model**

| SNP        | Chr 9<br>position | Allele<br>(Minor/ Major) | Minor Allele<br>Frequency |          | Covariate-adjusted additive genetic model* |                         |                       |
|------------|-------------------|--------------------------|---------------------------|----------|--------------------------------------------|-------------------------|-----------------------|
|            |                   |                          | Cases                     | Controls | Odds Ratio<br>(95% CI)                     | Asymptotic<br>P-value † | FWER                  |
|            |                   |                          |                           |          |                                            |                         | permuted<br>P-value ‡ |
| rs10965189 | 21930588          | A/C                      | 0.03                      | 0.04     | 0.76 (0.30-1.93)                           | 0.559                   | 1.000                 |
| rs10965197 | 21938666          | T/C                      | 0.45                      | 0.42     | 1.11 (0.79-1.55)                           | 0.540                   | 1.000                 |
| rs2518722  | 21942926          | T/C                      | 0.27                      | 0.31     | 0.82 (0.56-1.20)                           | 0.310                   | 1.000                 |
| rs12335941 | 21945669          | G/A                      | 0.37                      | 0.42     | 0.82 (0.58-1.16)                           | 0.266                   | 1.000                 |
| rs2027938  | 21946078          | A/G                      | 0.25                      | 0.28     | 0.89 (0.61-1.30)                           | 0.535                   | 1.000                 |
| rs9657608  | 21946230          | T/C                      | 0.09                      | 0.10     | 0.98 (0.56-1.72)                           | 0.952                   | 1.000                 |
| rs7041637  | 21951866          | A/C                      | 0.31                      | 0.30     | 1.02 (0.71-1.47)                           | 0.916                   | 1.000                 |
| rs3731257  | 21956221          | T/C                      | 0.29                      | 0.26     | 1.11 (0.77-1.61)                           | 0.569                   | 1.000                 |
| rs11515    | 21958199          | G/C                      | 0.15                      | 0.17     | 0.86 (0.55-1.33)                           | 0.498                   | 1.000                 |
| rs2811708  | 21963422          | T/G                      | 0.26                      | 0.31     | 0.79 (0.54-1.15)                           | 0.213                   | 0.996                 |
| rs3731239  | 21964218          | C/T                      | 0.35                      | 0.31     | 1.16 (0.81-1.64)                           | 0.416                   | 1.000                 |
| rs2811709  | 21970151          | A/G                      | 0.12                      | 0.13     | 0.95 (0.59-1.54)                           | 0.838                   | 1.000                 |

|            |          |     |      |      |                  |       |       |
|------------|----------|-----|------|------|------------------|-------|-------|
| rs4074785  | 21971583 | A/G | 0.10 | 0.09 | 1.13 (0.66-1.93) | 0.657 | 1.000 |
| rs3731222  | 21973914 | G/A | 0.13 | 0.16 | 0.81 (0.50-1.32) | 0.400 | 1.000 |
| rs3731211  | 21976847 | A/T | 0.26 | 0.33 | 0.72 (0.50-1.06) | 0.097 | 0.907 |
| rs10757262 | 21977874 | T/A | 0.14 | 0.16 | 0.83 (0.52-1.30) | 0.409 | 1.000 |
| rs3218020  | 21987872 | T/C | 0.38 | 0.41 | 0.81 (0.58-1.13) | 0.217 | 0.997 |
| rs3218009  | 21988757 | C/G | 0.14 | 0.08 | 1.87 (1.15-3.04) | 0.011 | 0.261 |
| rs3217992  | 21993223 | A/G | 0.40 | 0.45 | 0.76 (0.54-1.07) | 0.111 | 0.936 |
| rs1063192  | 21993367 | C/T | 0.41 | 0.34 | 1.43 (1.01-2.01) | 0.045 | 0.670 |
| rs2069418  | 21999698 | C/G | 0.43 | 0.36 | 1.38 (0.98-1.94) | 0.063 | 0.787 |
| rs495490   | 22000412 | C/T | 0.10 | 0.10 | 1.08 (0.63-1.86) | 0.790 | 1.000 |
| rs573687   | 22001642 | T/C | 0.35 | 0.29 | 1.38 (0.96-1.96) | 0.079 | 0.855 |
| rs13298881 | 22002051 | C/T | 0.13 | 0.14 | 0.87 (0.54-1.41) | 0.581 | 1.000 |
| rs545226   | 22002422 | C/T | 0.43 | 0.46 | 0.86 (0.61-1.19) | 0.357 | 1.000 |
| rs643319   | 22007836 | T/G | 0.45 | 0.41 | 1.25 (0.90-1.76) | 0.188 | 0.992 |
| rs523096   | 22009129 | C/T | 0.43 | 0.35 | 1.43 (1.02-2.00) | 0.038 | 0.604 |
| rs518394   | 22009673 | G/C | 0.43 | 0.36 | 1.46 (1.03-2.05) | 0.031 | 0.539 |
| rs564398   | 22019547 | G/A | 0.40 | 0.32 | 1.52 (1.07-2.15) | 0.020 | 0.398 |
| rs17694493 | 22031998 | G/C | 0.14 | 0.14 | 0.94 (0.59-1.51) | 0.801 | 1.000 |

|            |          |     |      |      |                  |       |       |
|------------|----------|-----|------|------|------------------|-------|-------|
| rs1412830  | 22033612 | A/G | 0.36 | 0.29 | 1.48 (1.05-2.09) | 0.027 | 0.498 |
| rs1011970  | 22052134 | T/G | 0.15 | 0.18 | 0.85 (0.55-1.32) | 0.477 | 1.000 |
| rs10811650 | 22057593 | A/G | 0.55 | 0.49 | 1.37 (0.98-1.90) | 0.064 | 0.792 |
| rs10757270 | 22062719 | A/G | 0.55 | 0.48 | 1.36 (0.98-1.89) | 0.063 | 0.787 |
| rs1412832  | 22067543 | C/T | 0.31 | 0.22 | 1.58 (1.10-2.28) | 0.013 | 0.290 |
| rs10116277 | 22071397 | G/T | 0.53 | 0.40 | 1.79 (1.29-2.51) | 0.001 | 0.019 |
| rs6475606  | 22071850 | C/T | 0.53 | 0.40 | 1.79 (1.28-2.50) | 0.001 | 0.020 |
| rs1547705  | 22072375 | C/A | 0.13 | 0.16 | 0.77 (0.48-1.23) | 0.276 | 1.000 |
| rs1333040  | 22073404 | C/T | 0.46 | 0.33 | 1.66 (1.20-2.28) | 0.002 | 0.054 |
| rs10738607 | 22078094 | A/G | 0.53 | 0.41 | 1.65 (1.19-2.30) | 0.003 | 0.077 |
| rs10757272 | 22078260 | C/T | 0.52 | 0.41 | 1.59 (1.14-2.21) | 0.006 | 0.157 |
| rs4977574  | 22088574 | A/G | 0.52 | 0.40 | 1.63 (1.17-2.27) | 0.004 | 0.103 |
| rs10125231 | 22092128 | A/G | 0.02 | 0.04 | 0.53 (0.16-1.75) | 0.297 | 1.000 |
| rs1333042  | 22093813 | A/G | 0.50 | 0.38 | 1.65 (1.19-2.30) | 0.003 | 0.079 |
| rs2383206  | 22105026 | A/G | 0.50 | 0.38 | 1.67 (1.20-2.32) | 0.002 | 0.061 |
| rs2383207  | 22105959 | A/G | 0.50 | 0.37 | 1.71 (1.23-2.38) | 0.002 | 0.040 |
| rs1333045  | 22109195 | T/C | 0.50 | 0.39 | 1.63 (1.17-2.28) | 0.004 | 0.113 |
| rs10757278 | 22114477 | A/G | 0.54 | 0.42 | 1.70 (1.22-2.38) | 0.002 | 0.052 |

|            |          |     |      |      |                  |       |       |
|------------|----------|-----|------|------|------------------|-------|-------|
| rs10757279 | 22114630 | A/G | 0.54 | 0.42 | 1.65 (1.18-2.32) | 0.004 | 0.098 |
| rs1333048  | 22115347 | A/C | 0.51 | 0.40 | 1.64 (1.18-2.30) | 0.004 | 0.098 |
| rs1333049  | 22115503 | C/G | 0.54 | 0.42 | 1.67 (1.20-2.33) | 0.003 | 0.066 |
| rs2891169  | 22121825 | G/A | 0.39 | 0.40 | 0.92 (0.66-1.28) | 0.626 | 1.000 |
| rs2383208  | 22122076 | G/A | 0.14 | 0.19 | 0.66 (0.41-1.06) | 0.084 | 0.870 |
| rs10811661 | 22124094 | C/T | 0.13 | 0.18 | 0.68 (0.42-1.10) | 0.117 | 0.946 |
| rs10757283 | 22124172 | T/C | 0.43 | 0.44 | 0.92 (0.66-1.28) | 0.603 | 1.000 |
| rs6475610  | 22131894 | T/C | 0.49 | 0.49 | 0.99 (0.72-1.36) | 0.947 | 1.000 |
| rs10757289 | 22150454 | C/G | 0.46 | 0.41 | 1.23 (0.89-1.71) | 0.214 | 0.997 |
| rs1679013  | 22196987 | T/C | 0.51 | 0.50 | 1.08 (0.78-1.50) | 0.659 | 1.000 |
| rs10113901 | 22364032 | C/T | 0.49 | 0.49 | 0.97 (0.70-1.34) | 0.837 | 1.000 |
| rs7046709  | 22366970 | G/A | 0.34 | 0.34 | 1.00 (0.71-1.41) | 0.987 | 1.000 |

Six most significant SNPs by asymptotic P-value selected for table 1 are shaded in grey.

SNP, single nucleotide polymorphism; Chr, chromosome; FWER, family-wise error rate; CI, confidence interval; MI, myocardial infarction

\* The cohort-specific clinical model consists of predictors from the multivariable model in Table 2.

† Asymptotic P-value covariate adjusted    ‡ Family-wise empirical P value is used to adjust for multiple comparisons.
